# Supplementary material for: Plastid genome sequences of Gymnochlora stellata, Lotharella vacuolata, and Partenskyella glossopodia reveal remarkable structural conservation among chlorarachniophyte species
Source: Springer Nature journal article supplement (doi:10.1007/s10265-016-0804-5), 2016-02-26
Supplement: 10265_2016_804_MOESM1_ESM.pdf [file 10265_2016_804_MOESM1_ESM.pdf]

**Plastid genome sequences of *Gymnochlora stellata*, *Lotharella vacuolata*, and *Partenskyella glossopodia* reveal remarkable structural conservation among chlorarachniophyte species**

Shigekatsu Suzuki<sup>1</sup>, Yoshihisa Hirakawa<sup>1,2</sup>, Rumiko Kofuji<sup>3</sup>, Mamoru Sugita<sup>4</sup>, Ken-ichiro Ishida<sup>1,2,\*</sup>

<sup>1</sup>Graduate School of Life and Environmental Sciences, University of Tsukuba, Ibaraki, Japan

<sup>2</sup>Faculty of Life and Environmental Sciences, University of Tsukuba, Ibaraki, Japan

<sup>3</sup>Graduate School of Natural Science and Technology, Kanazawa University, Ishikawa, Japan

<sup>4</sup>Center for Gene Research, Nagoya University, Aichi, Japan

\*Author for correspondence: Ken-ichiro Ishida, email: [ken@biol.tsukuba.ac.jp](mailto:ken@biol.tsukuba.ac.jp); Tel: +81 29 853 4533

Online Resource 1

List of the plastid genomes that we used in the comparative analyses

| Classification                        | Species                           | Accession NO.                      |                |
|---------------------------------------|-----------------------------------|------------------------------------|----------------|
| Ulvoephyceae                          | <i>Oltmannsiellopsis viridis</i>  | DQ291132.1                         |                |
|                                       | <i>Pseudodoclonium akinetum</i>   | AY835431.1                         |                |
|                                       | <i>Ulva</i> sp. UNAO0071828       | KP720616.1                         |                |
|                                       | <i>Bryopsis hypnoides</i>         | GQ892829.1                         |                |
|                                       | <i>Bryopsis plumosa</i>           | LN810504.1                         |                |
|                                       | <i>Tydemania expeditiones</i>     | LN810505.1                         |                |
| Chlorophyceae                         | <i>Acutodesmus obliquus</i>       | DQ396875.1                         |                |
|                                       | <i>Chlamydomonas reinhardtii</i>  | BK000554.2                         |                |
|                                       | <i>Dunaliella salina</i>          | GQ250046.1                         |                |
|                                       | <i>Volvox carter*</i>             | GU084820.1                         |                |
|                                       | <i>Floydiella terrestris</i>      | GU196268.1                         |                |
|                                       | <i>Oedogonium cardiacum</i>       | EU677193.1                         |                |
|                                       | <i>Schizomeris leibleinii</i>     | HQ700713.1                         |                |
|                                       | <i>Stigeoclonium helveticum</i>   | DQ630521.1                         |                |
|                                       | Trebouxiophyceae                  | <i>Coccomyxa subellipsoidea</i>    | HQ693844.1     |
|                                       |                                   | <i>Leptosira terrestris</i>        | EF506945.1     |
| <i>Oocystis solitaria</i>             |                                   | FJ968739.1                         |                |
| <i>Geminella minor</i>                |                                   | KM462883.1                         |                |
| <i>Gloeotilopsis sterilis</i>         |                                   | KM462877.1                         |                |
| <i>Planctonema lauterbornii</i>       |                                   | KM462880.1                         |                |
| <i>Ettlia pseudoalveolaris</i>        |                                   | KM462869.1                         |                |
| <i>Fusochloris perforata</i>          |                                   | KM462882.1                         |                |
| <i>Microthamnion kuetzingianum</i>    |                                   | KM462876.1                         |                |
| <i>Xylochloris irregularis</i>        |                                   | KM462872.1                         |                |
| <i>Neocystis brevis</i>               |                                   | KM462873.1                         |                |
| <i>Pabia signiensis</i>               |                                   | KM462866.1                         |                |
| <i>Koliella longiseta</i>             |                                   | KM462868.1                         |                |
| <i>Stichococcus bacillaris</i>        |                                   | KM462864.1                         |                |
| <i>Prasiolopsis</i> sp. SAG 84.81     |                                   | KM462862.1                         |                |
| " <i>Chlorella</i> " <i>mirabilis</i> |                                   | KM462865.1                         |                |
| <i>Chlorosarcina brevispinosa</i>     |                                   | KM462875.1                         |                |
| <i>Myrmecia israelensis</i>           |                                   | KM462861.1                         |                |
| <i>Lobosphaera incisa</i>             |                                   | KM821265.1                         |                |
| <i>Dictyochloropsis reticulata</i>    |                                   | KM462860.1                         |                |
| <i>Watanabea reniformis</i>           |                                   | KM462863.1                         |                |
| <i>Botryococcus braunii</i>           |                                   | KM462884.1                         |                |
| <i>Choricystis minor</i>              |                                   | KM462878.1                         |                |
| <i>Elliptochloris bilobata</i>        |                                   | KM462887.1                         |                |
| Trebouxiophyceae sp. MX-AZ01          |                                   | JX402620.1                         |                |
|                                       |                                   | <i>Paradoxia multiseta</i>         | KM462879.1     |
| Chlorodendrophyceae                   |                                   | <i>Tetraselmis subcordiformis*</i> | GANN00000000.1 |
| Pedinophyceae                         |                                   | <i>Pedinomonas minor</i>           | FJ968740.1     |
|                                       |                                   | <i>Pedinomonas tuberculata</i>     | KM462867.1     |
|                                       |                                   | <i>Marsupiomonas</i> sp. NIES 1824 | KM462870.1     |
| Chlorellales                          |                                   | <i>Chlorella vulgaris</i>          | AB001684.1     |
|                                       |                                   | <i>Chlorella variabilis</i>        | KJ718922.1     |
|                                       | <i>Chlorella sorokiniana</i>      | KJ397925.1                         |                |
|                                       | <i>Chlorella</i> sp. ArM0029B     | KF554427.1                         |                |
|                                       | <i>Parachlorella kessleri</i>     | FJ968741.1                         |                |
|                                       | <i>Dicloster acutus</i>           | KM462885.1                         |                |
|                                       | <i>Pseudochloris wilhelmii</i>    | KM462886.1                         |                |
|                                       | <i>Marvania geminata</i>          | KM462888.1                         |                |
| Prasinophytes                         | <i>Prasinoderma coloniale</i>     | KJ746598.1                         |                |
|                                       | Prasinophyceae sp. MBIC10622      | KJ746602.1                         |                |
|                                       | <i>Prasinococcus</i> sp. CCMP1194 | KJ746597.1                         |                |
|                                       | <i>Pyramimonas parkeae</i>        | FJ493499.1                         |                |
|                                       | <i>Ostreococcus tauri</i>         | CR954199.2                         |                |
|                                       | <i>Monomastix</i> sp. OKE-1       | FJ493497.1                         |                |
|                                       | <i>Nephroselmis olivacea</i>      | AF137379.1                         |                |
|                                       | <i>Nephroselmis astigmatica</i>   | KJ746600.1                         |                |
|                                       | <i>Pycnococcus provasolii</i>     | FJ493498.1                         |                |
|                                       | <i>Picocystis salinarum</i>       | KJ746599.1                         |                |
|                                       | Prasinophyceae sp. CCMP1205       | KJ746601.1                         |                |
|                                       | Chlorarachniophyceae              | <i>Bigeloviella natans</i>         | DQ851108.1     |
|                                       |                                   | <i>Lotharella oceanica</i>         | KF438023.1     |

\*used only by phylogenetic analyses

## Online Resource 2

### Conserved genes in the plastid genomes of chlorarachniophytes

| Function               | Conserved genes                                                                                                                                                                                                                                                                                                                           |
|------------------------|-------------------------------------------------------------------------------------------------------------------------------------------------------------------------------------------------------------------------------------------------------------------------------------------------------------------------------------------|
| ATP synthase           | <i>atpA, atpB, atpE, atpF, atpH, atpI</i>                                                                                                                                                                                                                                                                                                 |
| Cytochrome             | <i>petA, petB, petD, petG</i>                                                                                                                                                                                                                                                                                                             |
| Photosystem I          | <i>psaA, psaB, psaC, psaJ</i>                                                                                                                                                                                                                                                                                                             |
| Photosystem II         | <i>psbA, psbB, psbC, psbD, psbE, psbF, psbH, psbI, psbJ, psbK, psbL, psbM, psbN, psbT</i>                                                                                                                                                                                                                                                 |
| RubisCO                | <i>rbcL</i>                                                                                                                                                                                                                                                                                                                               |
| LSU ribosomal proteins | <i>rpl14, rpl16, rpl19, rpl20, rpl2, rpl23, rpl36, rpl5</i>                                                                                                                                                                                                                                                                               |
| SSU ribosomal proteins | <i>rps11, rps12, rps14, rps18, rps19, rps2, rps3, rps4, rps7, rps8, rps9</i>                                                                                                                                                                                                                                                              |
| RNA polymearse         | <i>rpoA, rpoB, rpoC1, rpoC2</i>                                                                                                                                                                                                                                                                                                           |
| Miscellaneous          | <i>chlI, clpP, tufA, ycf1, ycf3, ycf4, maturase-like<sup>a</sup></i>                                                                                                                                                                                                                                                                      |
| rRNAs                  | <i>rrnS, rrnL, rrn5S</i>                                                                                                                                                                                                                                                                                                                  |
| tRNAs                  | <i>trnA (UGC), trnC (GCA), trnD (GUC), trnE (UUC), trnF (GAA), trnG (GCC)<sup>b</sup>, trnG (UCC), trnH (GUG)<sup>b</sup>, trnI (GAU), trnK (UUU), trnL (CAA)<sup>c</sup>, trnL (UAA), trnL (UAG), trnM (CAU), trnN (GUU), trnP (UGG), trnQ (UUG), trnR (ACG), trnR (UCU), trnS (GCU), trnT (UGU), trnV (UAC), trnW (CCA), trnY (GUA)</i> |

<sup>a</sup>lacking in the plastid genome of *B. natans*.

<sup>b</sup>lacking in the plastid genome of *L. vacuolata*.

<sup>c</sup>lacking in the plastid genome of *L. oceanica*.
